# Supplementary material for: Untargeted Metabolomics on Skin Mucus Extract of Channa argus against Staphylococcus aureus: Antimicrobial Activity and Mechanism
Source: MDPI journal article supplement (doi:10.3390/foods10122995), 2021-12-04
Supplement: s1 [file s1]

*Table S1. PLS-DA cross-validation details*

| Measure  | 1 comps | 2 comps | 3 comps | 4 comps | 5 comps |
|----------|---------|---------|---------|---------|---------|
| Accuracy | 1.0     | 1.0     | 1.0     | 1.0     | 1.0     |
| R2       | 0.90656 | 0.96898 | 0.993   | 0.99824 | 0.99941 |
| Q2       | 0.8572  | 0.94947 | 0.96161 | 0.96433 | 0.96826 |
